# Supplementary material
Source: Springer Nature journal article supplement (https://www.springermedizin.de/resource/supplementary/13069_2012_124_MOESM8_ESM.pdf/9659870)
Supplement: MOESM8 [file 9659870]

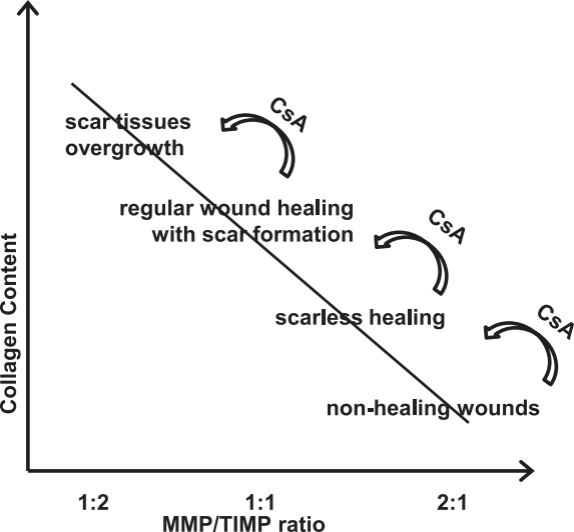

scar tissues  
overgrowth

CsA

regular wound healing  
with scar formation

CsA

scarless healing

CsA

non-healing wounds

1:2

1:1

2:1

MMP/TIMP ratio

Collagen Content
